# Supplementary material for: MPCM: a hardware coder for super slow motion video sequences
Source: Springer Nature journal article supplement (doi:10.1186/1687-6180-2013-142), 2013-08-27

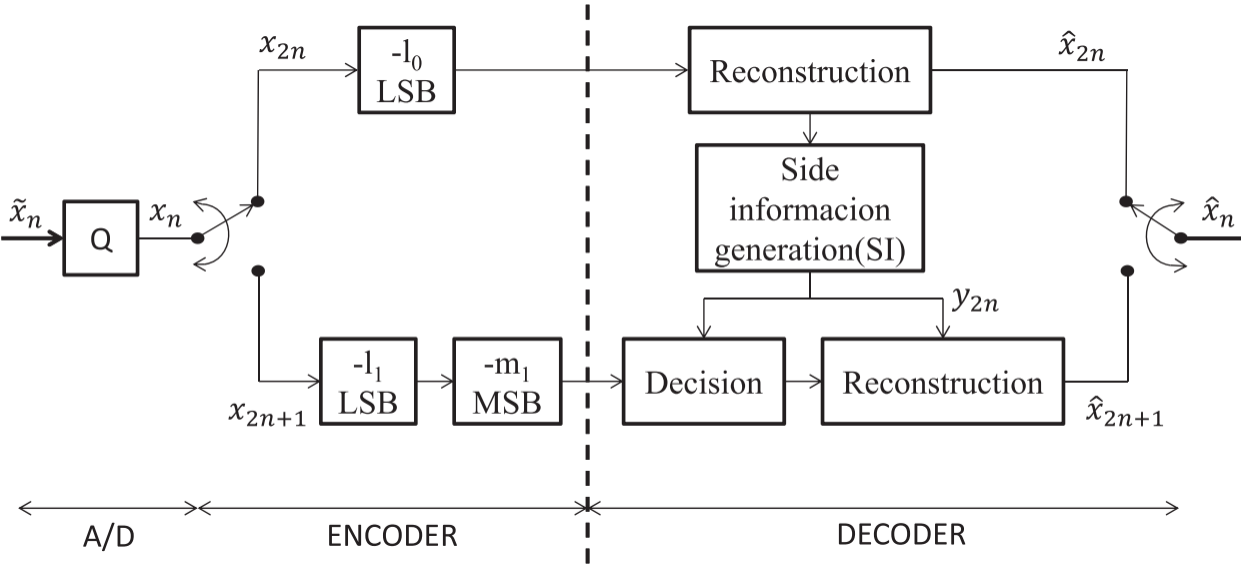

Supplement: 13634_2013_534_MOESM1_ESM.pdf [file 13634_2013_534_MOESM1_ESM.pdf]
