# Supplementary material for: MPCM: a hardware coder for super slow motion video sequences
Source: Springer Nature journal article supplement (doi:10.1186/1687-6180-2013-142), 2013-08-27
Supplement: 13634_2013_534_MOESM4_ESM.pdf [file 13634_2013_534_MOESM4_ESM.pdf]

Entire image

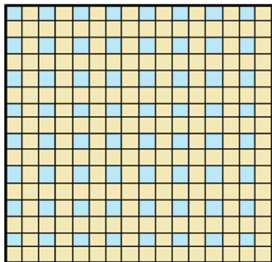

↓ 16 pixels in

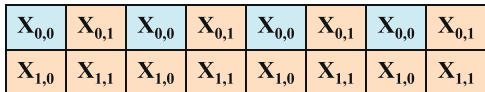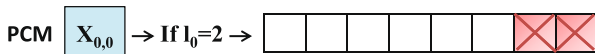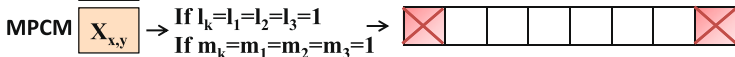

**ENCODER**

↓ 16 pixels out
